# Supplementary material
Source: publisher figshare collection journal article supplement (https://acs.figshare.com/ndownloader/files/5197375)
Supplement: Supplementary file 1 [file 5197375]

data_struc
 
_audit_creation_method            SHELXL-97
_chemical_name_systematic
;
 ?
;
_chemical_name_common             ?
_chemical_melting_point           ?
_chemical_formula_moiety          ?
_chemical_formula_sum
 'C18 H20 Cl2 Mn N4 O8'
_chemical_formula_weight          546.22
 
loop_
 _atom_type_symbol
 _atom_type_description
 _atom_type_scat_dispersion_real
 _atom_type_scat_dispersion_imag
 _atom_type_scat_source
 'C'  'C'   0.0033   0.0016
 'International Tables Vol C Tables 4.2.6.8 and 6.1.1.4'
 'H'  'H'   0.0000   0.0000
 'International Tables Vol C Tables 4.2.6.8 and 6.1.1.4'
 'N'  'N'   0.0061   0.0033
 'International Tables Vol C Tables 4.2.6.8 and 6.1.1.4'
 'O'  'O'   0.0106   0.0060
 'International Tables Vol C Tables 4.2.6.8 and 6.1.1.4'
 'Cl'  'Cl'   0.1484   0.1585
 'International Tables Vol C Tables 4.2.6.8 and 6.1.1.4'
 'Mn'  'Mn'   0.3368   0.7283
 'International Tables Vol C Tables 4.2.6.8 and 6.1.1.4'
 
_symmetry_cell_setting            Monoclinic
_symmetry_space_group_name_H-M    P2(1)
 
loop_
 _symmetry_equiv_pos_as_xyz
 'x, y, z'
 '-x, y+1/2, -z'
 
_cell_length_a                    9.0550(6)
_cell_length_b                    19.8290(14)
_cell_length_c                    12.2059(8)
_cell_angle_alpha                 90.00
_cell_angle_beta                  92.9450(10)
_cell_angle_gamma                 90.00
_cell_volume                      2188.7(3)
_cell_formula_units_Z             4
_cell_measurement_temperature     223(2)
_cell_measurement_reflns_used     ?
_cell_measurement_theta_min       ?
_cell_measurement_theta_max       ?
 
_exptl_crystal_description        ?
_exptl_crystal_colour             ?
_exptl_crystal_size_max           0.3
_exptl_crystal_size_mid           0.5
_exptl_crystal_size_min           0.5
_exptl_crystal_density_meas       ?
_exptl_crystal_density_diffrn     1.658
_exptl_crystal_density_method     'not measured'
_exptl_crystal_F_000              1116
_exptl_absorpt_coefficient_mu     0.902
_exptl_absorpt_correction_type    none
_exptl_absorpt_correction_T_min   ?
_exptl_absorpt_correction_T_max   ?
_exptl_absorpt_process_details    ?
 
_exptl_special_details
;
 ?
;
 
_diffrn_ambient_temperature       223(2)
_diffrn_radiation_wavelength      0.71073
_diffrn_radiation_type            MoK\a
_diffrn_radiation_source          'fine-focus sealed tube'
_diffrn_radiation_monochromator   graphite
_diffrn_measurement_device_type   'CCD area detector'
_diffrn_measurement_method        'phi and omega scans'
_diffrn_detector_area_resol_mean  ?
_diffrn_standards_number          ?
_diffrn_standards_interval_count  ?
_diffrn_standards_interval_time   ?
_diffrn_standards_decay_%         ?
_diffrn_reflns_number             14124
_diffrn_reflns_av_R_equivalents   0.0282
_diffrn_reflns_av_sigmaI/netI     0.0782
_diffrn_reflns_limit_h_min        -8
_diffrn_reflns_limit_h_max        12
_diffrn_reflns_limit_k_min        -23
_diffrn_reflns_limit_k_max        25
_diffrn_reflns_limit_l_min        -16
_diffrn_reflns_limit_l_max        15
_diffrn_reflns_theta_min          1.67
_diffrn_reflns_theta_max          29.01
_reflns_number_total              9196
_reflns_number_gt                 6260
_reflns_threshold_expression      >2sigma(I)
 
_computing_data_collection        'Bruker SMART'
_computing_cell_refinement        'Bruker SMART'
_computing_data_reduction         'Bruker SHELXTL'
_computing_structure_solution     'SHELXS-97 (Sheldrick, 1990)'
_computing_structure_refinement   'SHELXL-97 (Sheldrick, 1997)'
_computing_molecular_graphics     'Bruker SHELXTL'
_computing_publication_material   'Bruker SHELXTL'
 
_refine_special_details
;
 Refinement of F^2^ against ALL reflections.  The weighted R-factor wR and
 goodness of fit S are based on F^2^, conventional R-factors R are based
 on F, with F set to zero for negative F^2^. The threshold expression of
 F^2^ > 2sigma(F^2^) is used only for calculating R-factors(gt) etc. and is
 not relevant to the choice of reflections for refinement.  R-factors based
 on F^2^ are statistically about twice as large as those based on F, and R-
 factors based on ALL data will be even larger.
;
 
_refine_ls_structure_factor_coef  Fsqd
_refine_ls_matrix_type            full
_refine_ls_weighting_scheme       calc
_refine_ls_weighting_details
 'calc w=1/[\s^2^(Fo^2^)+(0.0301P)^2^+0.0000P] where P=(Fo^2^+2Fc^2^)/3'
_atom_sites_solution_primary      direct
_atom_sites_solution_secondary    difmap
_atom_sites_solution_hydrogens    geom
_refine_ls_hydrogen_treatment     mixed
_refine_ls_extinction_method      none
_refine_ls_extinction_coef        ?
_refine_ls_abs_structure_details
 'Flack H D (1983), Acta Cryst. A39, 876-881'
_refine_ls_abs_structure_Flack    0.023(15)
_refine_ls_number_reflns          9196
_refine_ls_number_parameters      595
_refine_ls_number_restraints      1
_refine_ls_R_factor_all           0.0619
_refine_ls_R_factor_gt            0.0357
_refine_ls_wR_factor_ref          0.0753
_refine_ls_wR_factor_gt           0.0678
_refine_ls_goodness_of_fit_ref    0.943
_refine_ls_restrained_S_all       0.943
_refine_ls_shift/su_max           0.048
_refine_ls_shift/su_mean          0.005
 
loop_
 _atom_site_label
 _atom_site_type_symbol
 _atom_site_fract_x
 _atom_site_fract_y
 _atom_site_fract_z
 _atom_site_U_iso_or_equiv
 _atom_site_adp_type
 _atom_site_occupancy
 _atom_site_symmetry_multiplicity
 _atom_site_calc_flag
 _atom_site_refinement_flags
 _atom_site_disorder_assembly
 _atom_site_disorder_group
Mn1 Mn 0.99729(6) 0.10966(3) 0.77458(4) 0.02512(15) Uani 1 1 d . . .
Cl1 Cl 1.08116(11) 0.01878(6) 0.97479(8) 0.0369(3) Uani 1 1 d . . .
O1 O 1.1003(3) 0.08989(14) 0.94445(19) 0.0345(7) Uani 1 1 d . . .
O2 O 0.9905(4) 0.01589(18) 1.0662(2) 0.0622(10) Uani 1 1 d . . .
O3 O 1.2223(3) -0.01069(18) 0.9984(3) 0.0631(10) Uani 1 1 d . . .
O4 O 1.0104(3) -0.01350(17) 0.8798(2) 0.0473(9) Uani 1 1 d . . .
Cl2 Cl 0.88440(12) 0.07589(6) 0.52491(8) 0.0389(3) Uani 1 1 d . . .
O11 O 0.8635(3) 0.06118(16) 0.6408(2) 0.0414(8) Uani 1 1 d . . .
O12 O 0.7458(3) 0.0819(2) 0.4719(3) 0.0945(15) Uani 1 1 d . . .
O13 O 0.9697(4) 0.13603(18) 0.5227(3) 0.0741(11) Uani 1 1 d . . .
O14 O 0.9656(4) 0.0218(2) 0.4825(3) 0.0841(13) Uani 1 1 d . . .
N1 N 0.8907(3) 0.21109(17) 0.7820(2) 0.0246(7) Uani 1 1 d . . .
N2 N 1.1678(3) 0.18998(15) 0.7422(2) 0.0246(7) Uani 1 1 d . . .
N3 N 0.7648(3) 0.09693(17) 0.8523(2) 0.0270(8) Uani 1 1 d . . .
N4 N 1.2051(3) 0.05779(17) 0.7058(2) 0.0243(8) Uani 1 1 d . . .
C1 C 0.9657(4) 0.27000(17) 0.7360(3) 0.0266(9) Uani 1 1 d . . .
H1A H 0.9508 0.2674 0.6552 0.032 Uiso 1 1 calc R . .
C2 C 1.1328(4) 0.26045(17) 0.7640(3) 0.0256(8) Uani 1 1 d . . .
H2A H 1.1501 0.2682 0.8437 0.031 Uiso 1 1 calc R . .
C3 C 1.2218(4) 0.31343(18) 0.7041(3) 0.0347(10) Uani 1 1 d . . .
H3A H 1.2096 0.3061 0.6247 0.042 Uiso 1 1 calc R . .
H3B H 1.3270 0.3088 0.7257 0.042 Uiso 1 1 calc R . .
C4 C 1.1696(4) 0.3844(2) 0.7316(4) 0.0440(11) Uani 1 1 d . . .
H4A H 1.2212 0.4171 0.6872 0.053 Uiso 1 1 calc R . .
H4B H 1.1959 0.3939 0.8090 0.053 Uiso 1 1 calc R . .
C5 C 1.0020(4) 0.3932(2) 0.7106(3) 0.0381(10) Uani 1 1 d . . .
H5A H 0.9725 0.4378 0.7361 0.046 Uiso 1 1 calc R . .
H5B H 0.9772 0.3904 0.6317 0.046 Uiso 1 1 calc R . .
C6 C 0.9172(4) 0.3392(2) 0.7700(3) 0.0324(10) Uani 1 1 d . . .
H6A H 0.9349 0.3444 0.8494 0.039 Uiso 1 1 calc R . .
H6B H 0.8110 0.3445 0.7526 0.039 Uiso 1 1 calc R . .
C7 C 0.7663(4) 0.2168(2) 0.8239(3) 0.0330(10) Uani 1 1 d . . .
H7A H 0.7233 0.2595 0.8317 0.040 Uiso 1 1 calc R . .
C8 C 0.6895(4) 0.1561(2) 0.8601(3) 0.0248(9) Uani 1 1 d . . .
C9 C 0.5492(4) 0.1597(2) 0.8972(3) 0.0321(11) Uani 1 1 d . . .
H9A H 0.5023 0.2016 0.9042 0.038 Uiso 1 1 calc R . .
C10 C 0.4776(4) 0.1007(2) 0.9241(3) 0.0317(10) Uani 1 1 d . . .
H10A H 0.3808 0.1017 0.9484 0.038 Uiso 1 1 calc R . .
C11 C 0.5515(5) 0.0405(2) 0.9143(3) 0.0349(11) Uani 1 1 d . . .
H11A H 0.5049 -0.0004 0.9305 0.042 Uiso 1 1 calc R . .
C12 C 0.6954(4) 0.0407(2) 0.8803(3) 0.0305(10) Uani 1 1 d . . .
H12A H 0.7461 -0.0006 0.8769 0.037 Uiso 1 1 calc R . .
C13 C 1.2825(4) 0.1724(2) 0.6921(3) 0.0276(9) Uani 1 1 d . . .
H13A H 1.3475 0.2052 0.6667 0.033 Uiso 1 1 calc R . .
C14 C 1.3112(4) 0.0999(2) 0.6749(3) 0.0256(9) Uani 1 1 d . . .
C15 C 1.4430(4) 0.0792(2) 0.6336(3) 0.0311(10) Uani 1 1 d . . .
H15A H 1.5132 0.1106 0.6114 0.037 Uiso 1 1 calc R . .
C16 C 1.4679(5) 0.0105(2) 0.6260(3) 0.0360(11) Uani 1 1 d . . .
H16A H 1.5570 -0.0057 0.5997 0.043 Uiso 1 1 calc R . .
C17 C 1.3614(5) -0.0335(2) 0.6570(3) 0.0359(11) Uani 1 1 d . . .
H17A H 1.3764 -0.0803 0.6523 0.043 Uiso 1 1 calc R . .
C18 C 1.2309(5) -0.0082(2) 0.6957(3) 0.0350(11) Uani 1 1 d . . .
H18A H 1.1577 -0.0388 0.7157 0.042 Uiso 1 1 calc R . .
Mn2 Mn 0.48801(6) 0.24335(3) 0.24002(5) 0.02506(15) Uani 1 1 d . . .
Cl3 Cl 0.40357(11) 0.33077(6) 0.03695(8) 0.0354(3) Uani 1 1 d . . .
O21 O 0.3824(3) 0.26031(14) 0.0696(2) 0.0343(7) Uani 1 1 d . . .
O22 O 0.4893(4) 0.33248(18) -0.0582(2) 0.0601(10) Uani 1 1 d . . .
O23 O 0.2614(3) 0.36135(17) 0.0167(3) 0.0536(9) Uani 1 1 d . . .
O24 O 0.4813(3) 0.36316(17) 0.1285(2) 0.0504(9) Uani 1 1 d . . .
Cl4 Cl 0.59134(12) 0.28816(6) 0.49481(8) 0.0389(3) Uani 1 1 d . . .
O31 O 0.6167(3) 0.28520(18) 0.3782(2) 0.0518(9) Uani 1 1 d . . .
O32 O 0.4868(4) 0.3419(2) 0.5096(3) 0.0681(10) Uani 1 1 d . . .
O33 O 0.5303(6) 0.2279(2) 0.5273(3) 0.1140(17) Uani 1 1 d . . .
O34 O 0.7266(4) 0.3048(2) 0.5485(3) 0.0738(11) Uani 1 1 d . . .
N21 N 0.3448(3) 0.16543(15) 0.3176(2) 0.0239(7) Uani 1 1 d . . .
N22 N 0.5711(3) 0.13971(16) 0.1973(2) 0.0240(7) Uani 1 1 d . . .
N23 N 0.2780(4) 0.29663(18) 0.3054(2) 0.0294(8) Uani 1 1 d . . .
N24 N 0.7222(3) 0.25464(19) 0.1662(3) 0.0320(8) Uani 1 1 d . . .
C21 C 0.3995(4) 0.09549(15) 0.3250(3) 0.0219(8) Uani 1 1 d . . .
H21A H 0.4775 0.0943 0.3849 0.026 Uiso 1 1 calc R . .
C22 C 0.4765(4) 0.08171(16) 0.2165(3) 0.0228(8) Uani 1 1 d . . .
H22A H 0.3983 0.0811 0.1568 0.027 Uiso 1 1 calc R . .
C23 C 0.5490(4) 0.0122(2) 0.2193(3) 0.0320(10) Uani 1 1 d . . .
H23A H 0.5895 0.0027 0.1480 0.038 Uiso 1 1 calc R . .
H23B H 0.6307 0.0116 0.2751 0.038 Uiso 1 1 calc R . .
C24 C 0.4366(4) -0.04150(19) 0.2453(3) 0.0338(10) Uani 1 1 d . . .
H24A H 0.3606 -0.0438 0.1853 0.041 Uiso 1 1 calc R . .
H24B H 0.4860 -0.0854 0.2503 0.041 Uiso 1 1 calc R . .
C25 C 0.3638(4) -0.02750(18) 0.3514(3) 0.0346(9) Uani 1 1 d . . .
H25A H 0.2898 -0.0624 0.3635 0.041 Uiso 1 1 calc R . .
H25B H 0.4383 -0.0293 0.4124 0.041 Uiso 1 1 calc R . .
C26 C 0.2897(4) 0.04114(19) 0.3492(3) 0.0320(10) Uani 1 1 d . . .
H26A H 0.2086 0.0416 0.2929 0.038 Uiso 1 1 calc R . .
H26B H 0.2480 0.0499 0.4203 0.038 Uiso 1 1 calc R . .
C27 C 0.2227(4) 0.1836(2) 0.3537(3) 0.0285(10) Uani 1 1 d . . .
H27A H 0.1593 0.1515 0.3831 0.034 Uiso 1 1 calc R . .
C28 C 0.1807(4) 0.2541(2) 0.3498(3) 0.0268(9) Uani 1 1 d . . .
C29 C 0.0529(5) 0.2775(2) 0.3956(3) 0.0371(11) Uani 1 1 d . . .
H29A H -0.0125 0.2470 0.4267 0.045 Uiso 1 1 calc R . .
C30 C 0.0225(5) 0.3457(2) 0.3952(3) 0.0401(12) Uani 1 1 d . . .
H30A H -0.0648 0.3623 0.4238 0.048 Uiso 1 1 calc R . .
C31 C 0.1227(5) 0.3884(2) 0.3521(3) 0.0393(11) Uani 1 1 d . . .
H31A H 0.1071 0.4352 0.3535 0.047 Uiso 1 1 calc R . .
C32 C 0.2475(4) 0.3624(2) 0.3064(3) 0.0331(10) Uani 1 1 d . . .
H32A H 0.3135 0.3924 0.2748 0.040 Uiso 1 1 calc R . .
C33 C 0.7040(4) 0.1340(2) 0.1705(3) 0.0301(10) Uani 1 1 d . . .
H33A H 0.7471 0.0912 0.1640 0.036 Uiso 1 1 calc R . .
C34 C 0.7897(4) 0.1953(2) 0.1497(3) 0.0290(10) Uani 1 1 d . . .
C35 C 0.9313(5) 0.1908(2) 0.1134(3) 0.0366(11) Uani 1 1 d . . .
H35A H 0.9756 0.1486 0.1033 0.044 Uiso 1 1 calc R . .
C36 C 1.0062(4) 0.2491(3) 0.0924(3) 0.0424(12) Uani 1 1 d . . .
H36A H 1.1032 0.2472 0.0684 0.051 Uiso 1 1 calc R . .
C37 C 0.9389(5) 0.3099(2) 0.1064(4) 0.0389(12) Uani 1 1 d . . .
H37A H 0.9871 0.3504 0.0904 0.047 Uiso 1 1 calc R . .
C38 C 0.7972(5) 0.3101(2) 0.1451(3) 0.0362(11) Uani 1 1 d . . .
H38A H 0.7520 0.3520 0.1569 0.043 Uiso 1 1 calc R . .
 
loop_
 _atom_site_aniso_label
 _atom_site_aniso_U_11
 _atom_site_aniso_U_22
 _atom_site_aniso_U_33
 _atom_site_aniso_U_23
 _atom_site_aniso_U_13
 _atom_site_aniso_U_12
Mn1 0.0217(3) 0.0225(4) 0.0314(3) -0.0014(3) 0.0034(3) 0.0000(3)
Cl1 0.0343(6) 0.0374(7) 0.0390(6) 0.0070(5) 0.0018(5) 0.0012(5)
O1 0.0354(16) 0.033(2) 0.0358(15) 0.0064(13) 0.0060(13) 0.0001(13)
O2 0.081(2) 0.065(3) 0.0429(18) 0.0095(18) 0.0288(18) -0.011(2)
O3 0.0402(19) 0.057(3) 0.090(3) 0.0211(19) -0.0166(18) 0.0110(17)
O4 0.0355(18) 0.052(2) 0.0545(19) -0.0124(16) 0.0044(15) -0.0015(15)
Cl2 0.0362(6) 0.0469(7) 0.0337(6) 0.0022(5) 0.0035(5) -0.0084(5)
O11 0.0431(18) 0.052(2) 0.0289(15) 0.0007(13) 0.0001(13) -0.0098(15)
O12 0.046(2) 0.180(5) 0.054(2) 0.015(2) -0.0221(17) -0.007(2)
O13 0.082(3) 0.059(3) 0.082(3) 0.0202(19) 0.003(2) -0.0319(19)
O14 0.095(3) 0.077(3) 0.084(3) -0.032(2) 0.045(2) 0.004(2)
N1 0.0184(17) 0.0269(19) 0.0287(17) -0.0020(14) 0.0030(14) -0.0011(14)
N2 0.0266(17) 0.0213(17) 0.0251(17) 0.0022(13) -0.0045(14) 0.0027(13)
N3 0.0206(17) 0.027(2) 0.0337(17) -0.0021(15) -0.0007(14) 0.0020(16)
N4 0.0241(18) 0.023(2) 0.0257(17) -0.0049(14) 0.0031(15) -0.0029(15)
C1 0.030(2) 0.025(2) 0.024(2) 0.0011(15) -0.0051(17) -0.0015(16)
C2 0.026(2) 0.022(2) 0.028(2) -0.0016(15) -0.0007(16) -0.0036(15)
C3 0.030(2) 0.026(2) 0.048(3) 0.0103(19) -0.0017(19) -0.0045(17)
C4 0.040(3) 0.027(2) 0.063(3) 0.011(2) -0.009(2) -0.0108(19)
C5 0.042(3) 0.029(2) 0.043(3) 0.002(2) -0.005(2) 0.0006(19)
C6 0.035(2) 0.026(3) 0.035(2) -0.0019(18) -0.0024(18) 0.0046(19)
C7 0.031(2) 0.029(3) 0.039(2) -0.0074(19) 0.003(2) 0.0057(19)
C8 0.021(2) 0.025(2) 0.029(2) -0.0005(17) 0.0024(18) -0.0025(18)
C9 0.023(2) 0.042(3) 0.031(2) -0.006(2) 0.0005(18) 0.005(2)
C10 0.024(2) 0.049(3) 0.023(2) -0.003(2) 0.0039(17) -0.007(2)
C11 0.032(3) 0.040(3) 0.033(2) 0.0018(19) 0.002(2) -0.013(2)
C12 0.029(2) 0.024(3) 0.038(2) 0.0006(18) -0.0004(19) -0.0048(19)
C13 0.023(2) 0.030(2) 0.030(2) 0.0045(17) 0.0030(18) -0.0044(17)
C14 0.029(2) 0.027(3) 0.0207(18) 0.0031(17) 0.0014(16) 0.0040(19)
C15 0.025(2) 0.040(3) 0.029(2) 0.0000(19) 0.0059(17) 0.002(2)
C16 0.031(2) 0.047(3) 0.031(2) -0.003(2) 0.0062(19) 0.011(2)
C17 0.044(3) 0.026(3) 0.038(2) -0.004(2) 0.003(2) 0.010(2)
C18 0.037(3) 0.033(3) 0.035(2) -0.005(2) 0.005(2) -0.003(2)
Mn2 0.0240(3) 0.0209(4) 0.0305(3) -0.0018(3) 0.0033(3) 0.0003(3)
Cl3 0.0353(6) 0.0345(7) 0.0365(6) 0.0057(5) 0.0033(5) 0.0007(5)
O21 0.0380(16) 0.0270(18) 0.0381(16) 0.0026(12) 0.0032(13) -0.0014(13)
O22 0.073(2) 0.063(2) 0.0470(19) 0.0179(18) 0.0324(18) 0.000(2)
O23 0.0382(19) 0.052(2) 0.070(2) 0.0211(18) -0.0027(16) 0.0140(17)
O24 0.0429(18) 0.053(2) 0.0540(19) -0.0158(16) -0.0085(15) -0.0062(16)
Cl4 0.0462(7) 0.0399(7) 0.0304(5) 0.0013(5) 0.0020(5) -0.0106(5)
O31 0.0416(19) 0.085(3) 0.0283(16) -0.0088(16) 0.0029(14) -0.0168(17)
O32 0.051(2) 0.086(3) 0.067(2) -0.0234(19) 0.0040(17) 0.012(2)
O33 0.190(5) 0.062(3) 0.093(3) 0.015(2) 0.046(3) -0.048(3)
O34 0.057(2) 0.109(3) 0.053(2) -0.0260(19) -0.0240(17) -0.0002(19)
N21 0.0240(17) 0.0272(18) 0.0206(16) -0.0024(14) 0.0002(14) 0.0019(14)
N22 0.0254(18) 0.0251(19) 0.0214(16) 0.0028(13) 0.0008(14) -0.0015(14)
N23 0.033(2) 0.027(2) 0.0287(18) -0.0012(15) 0.0013(16) 0.0089(17)
N24 0.0286(19) 0.030(2) 0.0377(19) -0.0037(16) 0.0045(15) -0.0026(17)
C21 0.029(2) 0.018(2) 0.0185(17) 0.0003(14) -0.0011(15) 0.0038(14)
C22 0.027(2) 0.0167(19) 0.0242(19) 0.0003(15) 0.0011(16) 0.0000(16)
C23 0.039(2) 0.022(2) 0.035(2) -0.0037(18) 0.0023(19) 0.0044(18)
C24 0.045(3) 0.015(2) 0.040(2) -0.0015(17) -0.009(2) 0.0046(19)
C25 0.041(2) 0.029(2) 0.034(2) 0.0012(18) -0.0010(19) -0.0027(18)
C26 0.038(2) 0.028(2) 0.030(2) 0.0045(17) 0.0038(19) -0.0003(18)
C27 0.026(2) 0.030(2) 0.030(2) 0.0031(18) 0.0077(18) 0.0003(17)
C28 0.029(2) 0.029(3) 0.023(2) 0.0022(17) 0.0045(17) -0.002(2)
C29 0.037(3) 0.038(3) 0.037(2) 0.0056(19) 0.011(2) 0.007(2)
C30 0.040(3) 0.044(3) 0.037(2) 0.000(2) 0.007(2) 0.018(2)
C31 0.049(3) 0.029(3) 0.039(3) -0.010(2) -0.002(2) 0.015(2)
C32 0.034(2) 0.021(3) 0.045(3) -0.0026(19) 0.002(2) -0.0005(19)
C33 0.029(2) 0.026(3) 0.035(2) -0.0034(18) 0.0010(18) 0.0050(18)
C34 0.022(2) 0.039(3) 0.026(2) -0.0059(18) 0.0000(18) 0.0015(19)
C35 0.032(3) 0.037(3) 0.042(3) -0.006(2) 0.010(2) 0.005(2)
C36 0.022(2) 0.068(4) 0.038(2) -0.006(3) 0.0096(19) -0.006(3)
C37 0.030(3) 0.044(3) 0.043(3) -0.001(2) 0.001(2) -0.012(2)
C38 0.036(3) 0.031(3) 0.042(2) 0.001(2) 0.004(2) -0.004(2)
 
_geom_special_details
;
 All esds (except the esd in the dihedral angle between two l.s. planes)
 are estimated using the full covariance matrix.  The cell esds are taken
 into account individually in the estimation of esds in distances, angles
 and torsion angles; correlations between esds in cell parameters are only
 used when they are defined by crystal symmetry.  An approximate (isotropic)
 treatment of cell esds is used for estimating esds involving l.s. planes.
;
 
loop_
 _geom_bond_atom_site_label_1
 _geom_bond_atom_site_label_2
 _geom_bond_distance
 _geom_bond_site_symmetry_2
 _geom_bond_publ_flag
Mn1 O11 2.203(3) . ?
Mn1 N1 2.235(3) . ?
Mn1 O1 2.264(3) . ?
Mn1 N2 2.267(3) . ?
Mn1 N4 2.338(3) . ?
Mn1 N3 2.366(3) . ?
Cl1 O3 1.422(3) . ?
Cl1 O2 1.420(3) . ?
Cl1 O4 1.446(3) . ?
Cl1 O1 1.470(3) . ?
Cl2 O12 1.388(3) . ?
Cl2 O14 1.413(4) . ?
Cl2 O13 1.422(3) . ?
Cl2 O11 1.467(3) . ?
N1 C7 1.266(4) . ?
N1 C1 1.476(5) . ?
N2 C13 1.280(4) . ?
N2 C2 1.460(4) . ?
N3 C12 1.333(5) . ?
N3 C8 1.362(5) . ?
N4 C18 1.336(5) . ?
N4 C14 1.342(5) . ?
C1 C6 1.505(5) . ?
C1 C2 1.546(4) . ?
C2 C3 1.532(5) . ?
C3 C4 1.527(5) . ?
C4 C5 1.536(5) . ?
C5 C6 1.523(5) . ?
C7 C8 1.470(6) . ?
C8 C9 1.372(5) . ?
C9 C10 1.385(6) . ?
C10 C11 1.377(6) . ?
C11 C12 1.388(5) . ?
C13 C14 1.478(6) . ?
C14 C15 1.381(5) . ?
C15 C16 1.385(6) . ?
C16 C17 1.369(6) . ?
C17 C18 1.389(5) . ?
Mn2 O31 2.165(3) . ?
Mn2 N21 2.257(3) . ?
Mn2 N22 2.259(3) . ?
Mn2 O21 2.269(3) . ?
Mn2 N23 2.350(3) . ?
Mn2 N24 2.357(3) . ?
Cl3 O22 1.430(3) . ?
Cl3 O23 1.433(3) . ?
Cl3 O24 1.441(3) . ?
Cl3 O21 1.468(3) . ?
Cl4 O33 1.384(4) . ?
Cl4 O34 1.399(3) . ?
Cl4 O32 1.443(4) . ?
Cl4 O31 1.455(3) . ?
N21 C27 1.263(4) . ?
N21 C21 1.474(4) . ?
N22 C33 1.268(4) . ?
N22 C22 1.461(4) . ?
N23 C32 1.334(5) . ?
N23 C28 1.352(5) . ?
N24 C38 1.325(5) . ?
N24 C34 1.346(6) . ?
C21 C26 1.506(5) . ?
C21 C22 1.551(4) . ?
C22 C23 1.526(5) . ?
C23 C24 1.518(5) . ?
C24 C25 1.508(5) . ?
C25 C26 1.517(5) . ?
C27 C28 1.449(6) . ?
C28 C29 1.391(5) . ?
C29 C30 1.380(6) . ?
C30 C31 1.366(6) . ?
C31 C32 1.385(5) . ?
C33 C34 1.471(6) . ?
C34 C35 1.381(5) . ?
C35 C36 1.371(7) . ?
C36 C37 1.365(7) . ?
C37 C38 1.390(6) . ?
 
loop_
 _geom_angle_atom_site_label_1
 _geom_angle_atom_site_label_2
 _geom_angle_atom_site_label_3
 _geom_angle
 _geom_angle_site_symmetry_1
 _geom_angle_site_symmetry_3
 _geom_angle_publ_flag
O11 Mn1 N1 101.57(12) . . ?
O11 Mn1 O1 142.01(10) . . ?
N1 Mn1 O1 106.10(10) . . ?
O11 Mn1 N2 122.06(10) . . ?
N1 Mn1 N2 70.98(10) . . ?
O1 Mn1 N2 91.67(10) . . ?
O11 Mn1 N4 87.95(11) . . ?
N1 Mn1 N4 140.15(11) . . ?
O1 Mn1 N4 87.20(10) . . ?
N2 Mn1 N4 71.25(11) . . ?
O11 Mn1 N3 77.51(10) . . ?
N1 Mn1 N3 71.64(11) . . ?
O1 Mn1 N3 87.00(10) . . ?
N2 Mn1 N3 140.60(11) . . ?
N4 Mn1 N3 147.77(12) . . ?
O3 Cl1 O2 112.0(2) . . ?
O3 Cl1 O4 109.7(2) . . ?
O2 Cl1 O4 111.2(2) . . ?
O3 Cl1 O1 109.21(19) . . ?
O2 Cl1 O1 108.48(19) . . ?
O4 Cl1 O1 106.00(18) . . ?
Cl1 O1 Mn1 110.39(15) . . ?
O12 Cl2 O14 111.7(3) . . ?
O12 Cl2 O13 113.5(3) . . ?
O14 Cl2 O13 109.6(2) . . ?
O12 Cl2 O11 107.99(19) . . ?
O14 Cl2 O11 107.4(2) . . ?
O13 Cl2 O11 106.40(19) . . ?
Cl2 O11 Mn1 122.34(16) . . ?
C7 N1 C1 121.3(3) . . ?
C7 N1 Mn1 119.4(3) . . ?
C1 N1 Mn1 119.3(2) . . ?
C13 N2 C2 122.4(3) . . ?
C13 N2 Mn1 117.9(2) . . ?
C2 N2 Mn1 119.0(2) . . ?
C12 N3 C8 117.2(3) . . ?
C12 N3 Mn1 129.3(3) . . ?
C8 N3 Mn1 113.3(2) . . ?
C18 N4 C14 116.9(3) . . ?
C18 N4 Mn1 127.7(3) . . ?
C14 N4 Mn1 115.4(3) . . ?
N1 C1 C6 118.0(3) . . ?
N1 C1 C2 106.4(3) . . ?
C6 C1 C2 110.3(3) . . ?
N2 C2 C3 116.4(3) . . ?
N2 C2 C1 107.2(3) . . ?
C3 C2 C1 110.1(3) . . ?
C2 C3 C4 110.5(3) . . ?
C3 C4 C5 112.4(3) . . ?
C6 C5 C4 111.0(3) . . ?
C1 C6 C5 110.4(3) . . ?
N1 C7 C8 119.6(4) . . ?
N3 C8 C9 122.9(4) . . ?
N3 C8 C7 115.9(3) . . ?
C9 C8 C7 121.1(4) . . ?
C8 C9 C10 119.1(4) . . ?
C11 C10 C9 118.4(4) . . ?
C10 C11 C12 119.4(4) . . ?
N3 C12 C11 122.8(4) . . ?
N2 C13 C14 119.1(3) . . ?
N4 C14 C15 124.2(4) . . ?
N4 C14 C13 115.6(3) . . ?
C15 C14 C13 120.2(4) . . ?
C16 C15 C14 117.7(4) . . ?
C17 C16 C15 119.3(4) . . ?
C16 C17 C18 119.1(4) . . ?
N4 C18 C17 122.8(4) . . ?
O31 Mn2 N21 103.49(11) . . ?
O31 Mn2 N22 110.86(12) . . ?
N21 Mn2 N22 71.31(10) . . ?
O31 Mn2 O21 147.32(12) . . ?
N21 Mn2 O21 105.18(10) . . ?
N22 Mn2 O21 93.04(10) . . ?
O31 Mn2 N23 88.61(11) . . ?
N21 Mn2 N23 70.90(11) . . ?
N22 Mn2 N23 140.56(12) . . ?
O21 Mn2 N23 86.22(10) . . ?
O31 Mn2 N24 78.62(11) . . ?
N21 Mn2 N24 140.65(12) . . ?
N22 Mn2 N24 71.41(11) . . ?
O21 Mn2 N24 88.89(11) . . ?
N23 Mn2 N24 147.84(13) . . ?
O22 Cl3 O23 111.7(2) . . ?
O22 Cl3 O24 110.8(2) . . ?
O23 Cl3 O24 110.1(2) . . ?
O22 Cl3 O21 109.10(19) . . ?
O23 Cl3 O21 108.70(18) . . ?
O24 Cl3 O21 106.20(19) . . ?
Cl3 O21 Mn2 109.58(15) . . ?
O33 Cl4 O34 115.0(3) . . ?
O33 Cl4 O32 109.1(3) . . ?
O34 Cl4 O32 109.3(2) . . ?
O33 Cl4 O31 109.3(2) . . ?
O34 Cl4 O31 106.83(19) . . ?
O32 Cl4 O31 106.8(2) . . ?
Cl4 O31 Mn2 132.21(18) . . ?
C27 N21 C21 123.0(3) . . ?
C27 N21 Mn2 118.9(3) . . ?
C21 N21 Mn2 118.1(2) . . ?
C33 N22 C22 122.9(3) . . ?
C33 N22 Mn2 118.2(3) . . ?
C22 N22 Mn2 118.3(2) . . ?
C32 N23 C28 117.8(3) . . ?
C32 N23 Mn2 127.9(3) . . ?
C28 N23 Mn2 114.3(3) . . ?
C38 N24 C34 117.1(3) . . ?
C38 N24 Mn2 129.3(3) . . ?
C34 N24 Mn2 113.5(3) . . ?
N21 C21 C26 117.5(3) . . ?
N21 C21 C22 106.2(2) . . ?
C26 C21 C22 111.8(3) . . ?
N22 C22 C23 117.3(3) . . ?
N22 C22 C21 106.9(3) . . ?
C23 C22 C21 110.6(3) . . ?
C24 C23 C22 110.2(3) . . ?
C25 C24 C23 112.2(3) . . ?
C26 C25 C24 111.3(3) . . ?
C21 C26 C25 110.5(3) . . ?
N21 C27 C28 119.8(4) . . ?
N23 C28 C29 121.8(4) . . ?
N23 C28 C27 116.1(3) . . ?
C29 C28 C27 122.0(4) . . ?
C30 C29 C28 119.7(4) . . ?
C31 C30 C29 118.1(4) . . ?
C30 C31 C32 119.8(4) . . ?
N23 C32 C31 122.8(4) . . ?
N22 C33 C34 119.1(4) . . ?
N24 C34 C35 122.7(4) . . ?
N24 C34 C33 116.7(3) . . ?
C35 C34 C33 120.6(4) . . ?
C36 C35 C34 118.9(4) . . ?
C37 C36 C35 119.5(4) . . ?
C36 C37 C38 118.2(4) . . ?
N24 C38 C37 123.6(4) . . ?
 
_diffrn_measured_fraction_theta_max    0.893
_diffrn_reflns_theta_full              29.01
_diffrn_measured_fraction_theta_full   0.893
_refine_diff_density_max    0.444
_refine_diff_density_min   -0.397
_refine_diff_density_rms    0.075
